# Supplementary material for: ACCESS model: a step toward an empowerment model in global health education
Source: Frontiers journal article supplement (doi:10.3389/feduc.2023.1214743), 2023-09-20

## Appendix for ACCESS Infrastructure

### Appendix 1: The ACCESS Guest House

The guest house is used to host local and international students during their rotation.

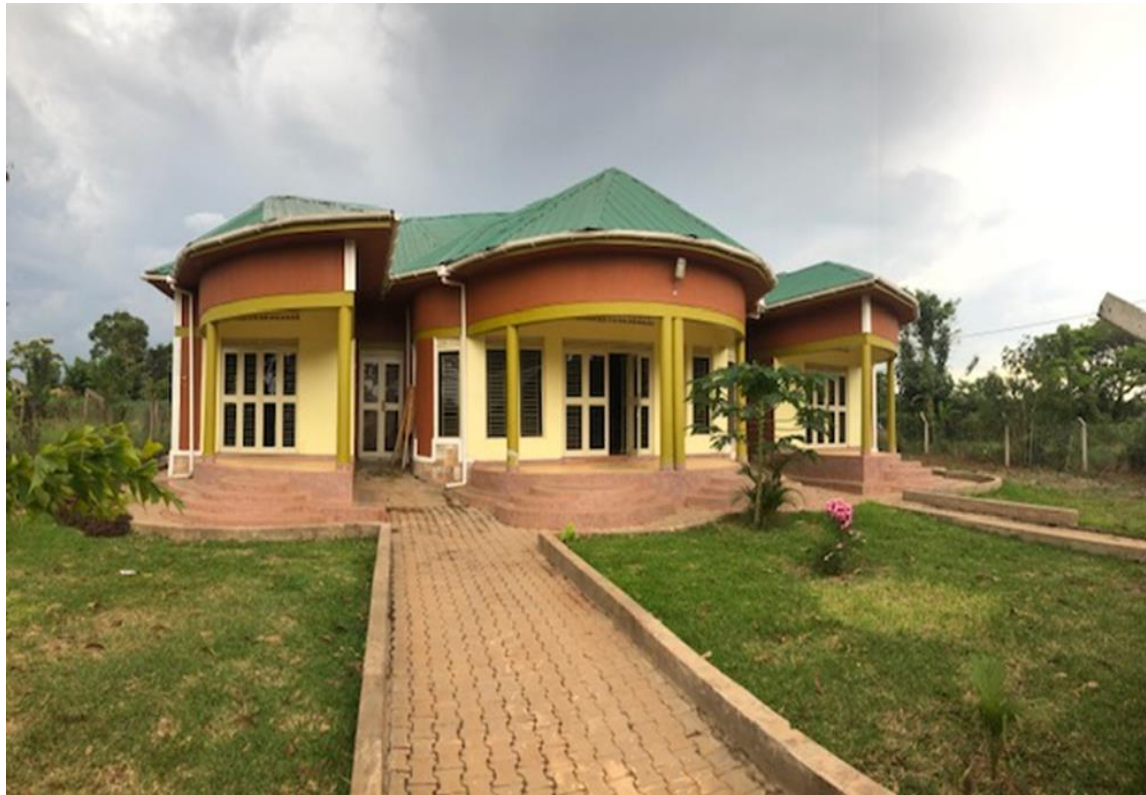

### Appendix 2: ACCESS Classroom Block

*This Classroom was built a group of visiting partners who set the first step to establishing the ACCESS School of Nursing and Midwifery in Nakaseke which currently hosts over 200 students, majority of whom work in rural areas after their training. GH students participate in training of nurses and midwives during their electives at ACCESS.*

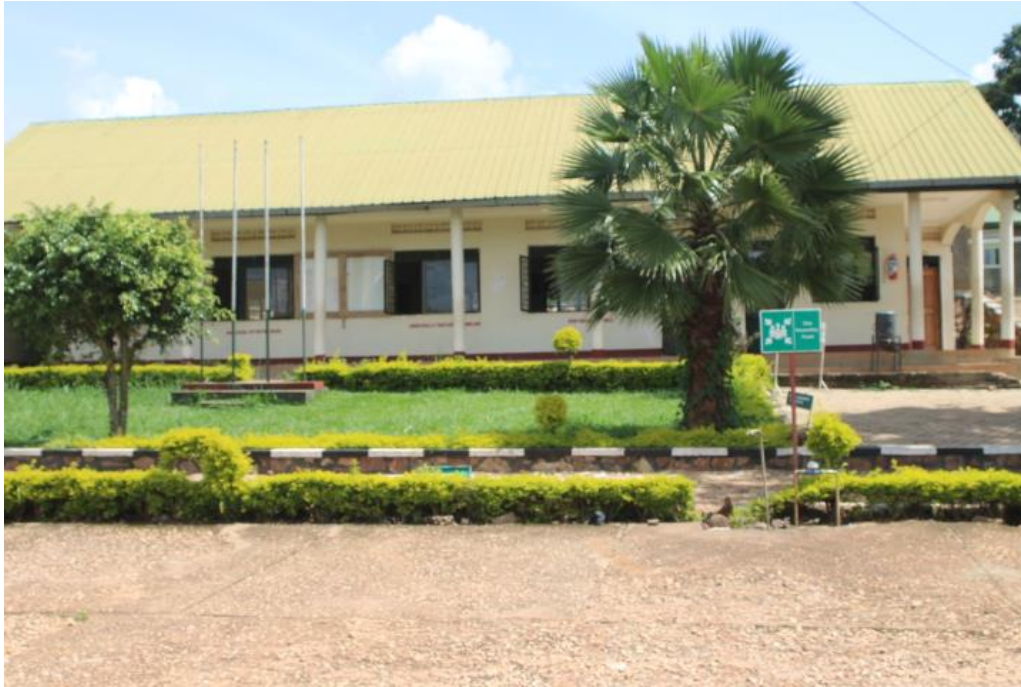

### **Appendix 3: ACCESS Women's Clinic**

*This is the health facility that now houses services for mothers and their children at ACCESS.*

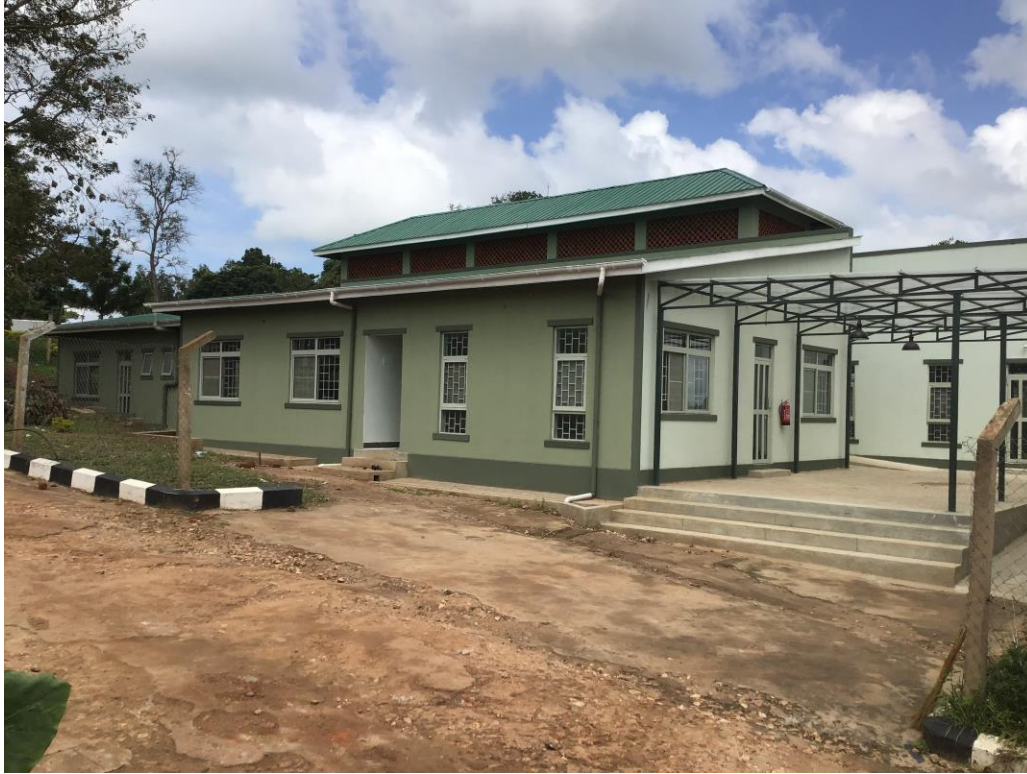

**Appendix 4: The ACCESS Pre-school Before and -After intervention from Grace's Promise.**

*This early childhood development program now trains 146 pupils running from as far as 20-kilometer radius. This was the structure before and after intervention of the 16-year-old Grace Herrick who worked with her family and other individuals to set up the Grace's Promise organization that now supports children 2-6 years to have early childhood education in Uganda.*



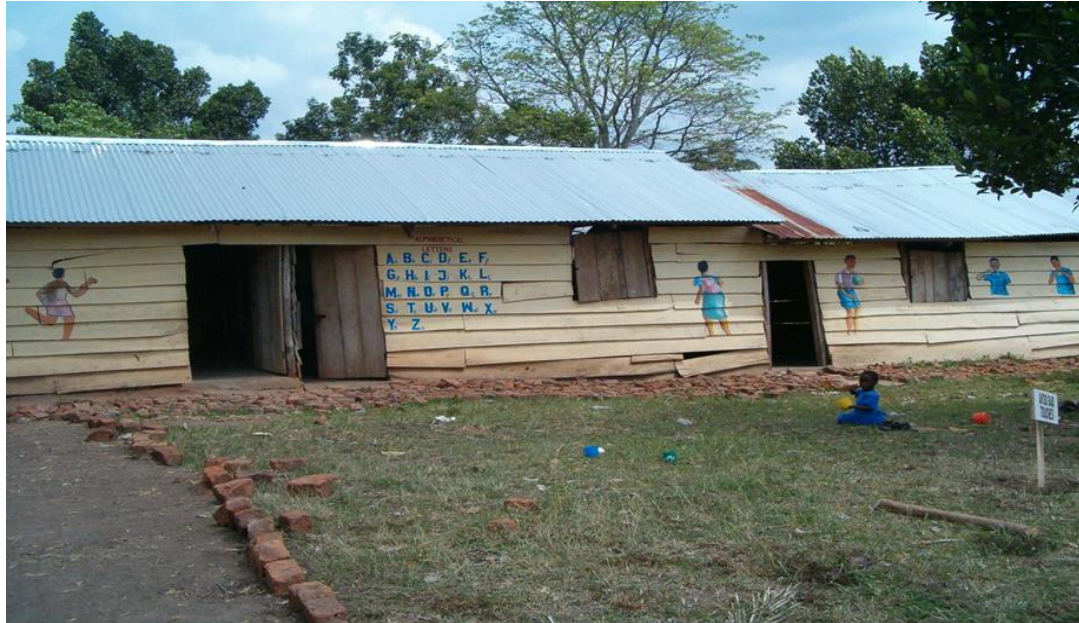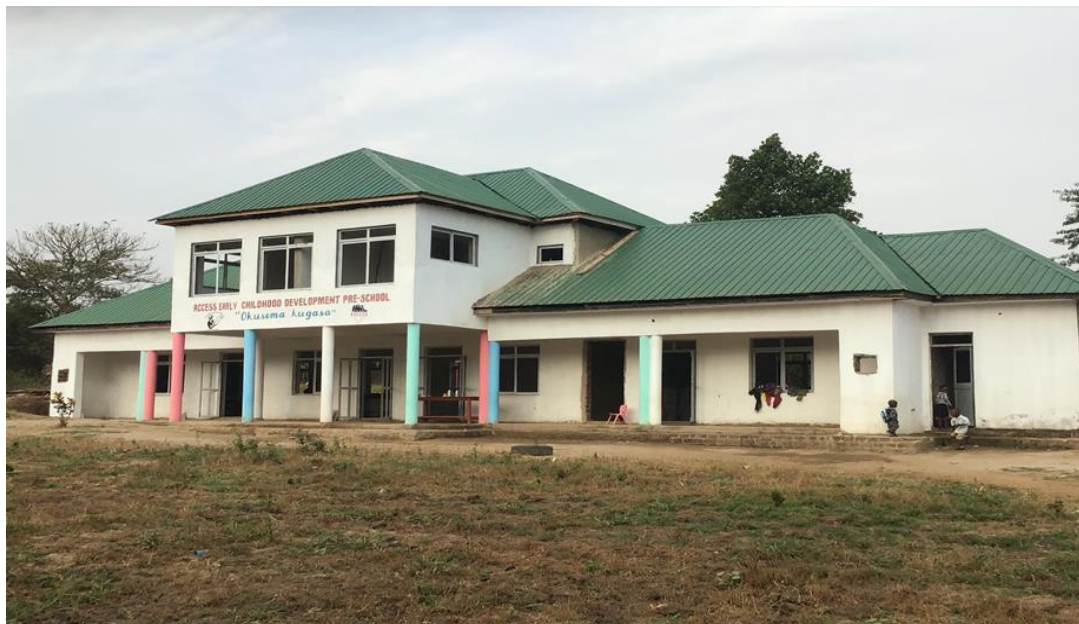



Supplement: Presentation_1.pdf [file Presentation_1.pdf]
